# Supplementary material for: Crosstalk between ORMDL3, serine palmitoyltransferase, and 5-lipoxygenase in the sphingolipid and eicosanoid metabolic pathways
Source: PubMed Central journal article supplement (PMC8527048; doi:10.1016/j.jlr.2021.100121), 2021-09-22
Supplement: mmc2.pdf [file mmc2.pdf]

# MATRIX SCIENCE Mascot Search Results

User : q  
 Email :  
 Search title : Bugajev\_101118\_0\_D23\_000002.d  
 MS data file : D23.mgf  
 Database : Uniprot 20210818 (565254 sequences; 203850821 residues)  
 Taxonomy : Mammalia (mammals) (67385 sequences)  
 Timestamp : 18 Aug 2021 at 14:39:43 GMT  
 Top Score : 149 for **Mixture 1**, LOX5\_MOUSE + K1C10\_HUMAN + K2C1\_HUMAN

|                                       | Uniprot | Decoy |
|---------------------------------------|---------|-------|
| Protein hits above identity threshold | 4       | 0     |
| Highest scoring protein hit           | 81      | 26    |

## Mascot Score Histogram

Protein score is  $-10 \cdot \log(P)$ , where P is the probability that the observed match is a random event. Protein scores greater than 61 are significant ( $p < 0.05$ ).

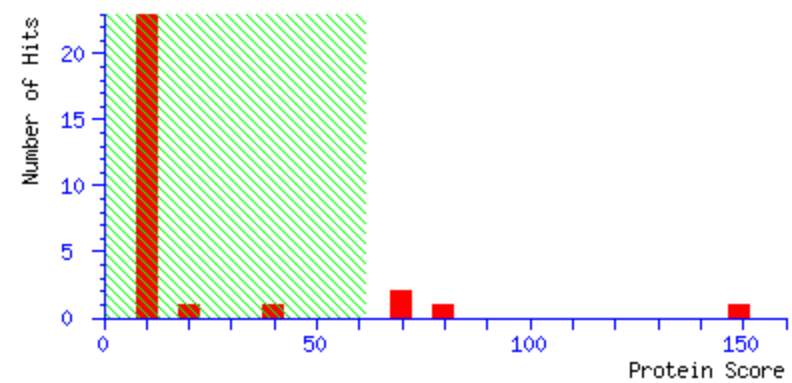

## Concise Protein Summary Report

Significance threshold  $p <$  
 Max. number of hits

1. **Mixture 1** Total score: **149** Expect:  $8.5e-011$  Matches: 56  
 Components (only one family member shown for each component):

[LOX5\\_MOUSE](#) Mass: 78602 Score: **81** Expect: 0.00049 Matches: 21  
Polyunsaturated fatty acid 5-lipoxygenase OS=Mus musculus OX=10090 GN=Alox5 PE=1 SV=3  
[K1C10\\_HUMAN](#) Mass: 59020 Score: **70** Expect: 0.0061 Matches: 18  
Keratin, type I cytoskeletal 10 OS=Homo sapiens OX=9606 GN=KRT10 PE=1 SV=6  
[K2C1\\_HUMAN](#) Mass: 66170 Score: **69** Expect: 0.0089 Matches: 18  
Keratin, type II cytoskeletal 1 OS=Homo sapiens OX=9606 GN=KRT1 PE=1 SV=6

---

2. [LOX5\\_MOUSE](#) Mass: 78602 Score: **81** Expect: 0.00049 Matches: 21  
Polyunsaturated fatty acid 5-lipoxygenase OS=Mus musculus OX=10090 GN=Alox5 PE=1 SV=3  
[LOX5\\_MESAU](#) Mass: 78565 Score: 44 Expect: 3 Matches: 15  
Polyunsaturated fatty acid 5-lipoxygenase OS=Mesocricetus auratus OX=10036 GN=ALOX5 PE=2 SV=2  
[LOX5\\_RAT](#) Mass: 78779 Score: 37 Expect: 12 Matches: 15  
Polyunsaturated fatty acid 5-lipoxygenase OS=Rattus norvegicus OX=10116 GN=Alox5 PE=1 SV=3  
[LOX5\\_HUMAN](#) Mass: 78675 Score: 10 Expect: 6.4e+003 Matches: 9  
Polyunsaturated fatty acid 5-lipoxygenase OS=Homo sapiens OX=9606 GN=ALOX5 PE=1 SV=2  
[LYSC\\_FELCA](#) Mass: 2369 Score: 9 Expect: 8.2e+003 Matches: 1  
Lysozyme C (Fragment) OS=Felis catus OX=9685 GN=LYZ PE=1 SV=1  
[PA55H\\_SHEEP](#) Mass: 2348 Score: 9 Expect: 8.2e+003 Matches: 1  
Pregnancy-associated glycoprotein 55h (Fragment) OS=Ovis aries OX=9940 PE=1 SV=1

---

3. [K1C10\\_HUMAN](#) Mass: 59020 Score: **70** Expect: 0.0061 Matches: 18  
Keratin, type I cytoskeletal 10 OS=Homo sapiens OX=9606 GN=KRT10 PE=1 SV=6  
[K1C10\\_CANLF](#) Mass: 57847 Score: 22 Expect: 4.5e+002 Matches: 11  
Keratin, type I cytoskeletal 10 OS=Canis lupus familiaris OX=9615 GN=KRT10 PE=2 SV=1  
[THIO\\_MOUSE](#) Mass: 12010 Score: 10 Expect: 7.1e+003 Matches: 2  
Thioredoxin OS=Mus musculus OX=10090 GN=Txn PE=1 SV=3  
[THIO\\_RAT](#) Mass: 12008 Score: 10 Expect: 7.1e+003 Matches: 2  
Thioredoxin OS=Rattus norvegicus OX=10116 GN=Txn PE=1 SV=2

---

4. [K2C1\\_HUMAN](#) Mass: 66170 Score: **69** Expect: 0.0089 Matches: 18  
Keratin, type II cytoskeletal 1 OS=Homo sapiens OX=9606 GN=KRT1 PE=1 SV=6  
[K2C1\\_PANTR](#) Mass: 65621 Score: **62** Expect: 0.04 Matches: 16  
Keratin, type II cytoskeletal 1 OS=Pan troglodytes OX=9598 GN=KRT1 PE=2 SV=1  
[RL36\\_RAT](#) Mass: 12317 Score: 10 Expect: 7.1e+003 Matches: 2  
60S ribosomal protein L36 OS=Rattus norvegicus OX=10116 GN=Rpl36 PE=1 SV=2  
[RL36\\_HUMAN](#) Mass: 12303 Score: 10 Expect: 7.1e+003 Matches: 2  
60S ribosomal protein L36 OS=Homo sapiens OX=9606 GN=RPL36 PE=1 SV=3  
[RL36\\_PONAB](#) Mass: 12303 Score: 10 Expect: 7.1e+003 Matches: 2  
60S ribosomal protein L36 OS=Pongo abelii OX=9601 GN=RPL36 PE=3 SV=3  
[RL36\\_BOVIN](#) Mass: 12273 Score: 10 Expect: 7.1e+003 Matches: 2  
60S ribosomal protein L36 OS=Bos taurus OX=9913 GN=RPL36 PE=3 SV=3  
[COLI\\_CAMDR](#) Mass: 3436 Score: 9 Expect: 7.6e+003 Matches: 1  
Beta-endorphin OS=Camelus dromedarius OX=9838 GN=POMC PE=1 SV=1  
[PRR33\\_MOUSE](#) Mass: 28673 Score: 9 Expect: 8.3e+003 Matches: 3

5. [K1C9\\_HUMAN](#) Mass: 62255 Score: 36 Expect: 15 Matches: 11  
Keratin, type I cytoskeletal 9 OS=Homo sapiens OX=9606 GN=KRT9 PE=1 SV=3  
[PRCD\\_MOUSE](#) Mass: 5984 Score: 10 Expect: 6.9e+003 Matches: 1  
Photoreceptor disk component PRCD OS=Mus musculus OX=10090 GN=Prcd PE=1 SV=1
- 

## Search Parameters

Type of search : Peptide Mass Fingerprint  
Enzyme : Trypsin/P  
Fixed modifications : [Carbamidomethyl \(C\)](#)  
Variable modifications : [Oxidation \(M\)](#)  
Mass values : Monoisotopic  
Protein Mass : Unrestricted  
Peptide Mass Tolerance :  $\pm 5$  ppm  
Peptide Charge State : 1+  
Max Missed Cleavages : 2  
Number of queries : 117  
Selected for scoring : 84

Mascot: <http://www.matrixscience.com/>
