# Supplementary material for: Crosstalk between ORMDL3, serine palmitoyltransferase, and 5-lipoxygenase in the sphingolipid and eicosanoid metabolic pathways
Source: PubMed Central journal article supplement (PMC8527048; doi:10.1016/j.jlr.2021.100121), 2021-09-22
Supplement: mmc5.pdf [file mmc5.pdf]

## Protein View: LOX5\_MOUSE

**Polyunsaturated fatty acid 5-lipoxygenase OS=Mus musculus OX=10090 GN=Alox5 PE=1 SV=3**

**Database:** Uniprot  
**Score:** 81  
**Expect:** 0.00049  
**Monoisotopic mass (M<sub>r</sub>):** 78602  
**Calculated pI:** 5.78  
**Taxonomy:** Mus musculus

Sequence similarity is available as [an NCBI BLAST search of LOX5\\_MOUSE against nr.](#)

### Search parameters

**MS data file:** D23.mgf  
**Enzyme:** Trypsin/P: cuts C-term side of KR.  
**Fixed modifications:** Carbamidomethyl (C)  
**Variable modifications:** Oxidation (M)  
**Mass values searched:** 117  
**Mass values matched:** 21

### Protein sequence coverage: 35%

Matched peptides shown in **bold red**.

|     |                    |                    |                    |                   |                   |
|-----|--------------------|--------------------|--------------------|-------------------|-------------------|
| 1   | MPSYTVTVAT         | GSQWFAGTDD         | YIYLSLIGSA         | GCSEKHLLEDK       | <b>AFYNDFERGA</b> |
| 51  | <b>VDSYDVTVDE</b>  | <b>ELGEIYLVKI</b>  | EKR <b>KYWLHDD</b> | <b>WYLKYITLKT</b> | <b>PHGDYIEFPC</b> |
| 101 | <b>YRWITGEGEI</b>  | <b>VLRDGRAKLA</b>  | RDDQIHILKQ         | HRRKELEARQ        | KQYRWMEWNP        |
| 151 | GFPLSIDAKC         | HKDLPRDIQF         | DSEK <b>GVDFVL</b> | <b>NYSKAMENLF</b> | <b>INRFMHMFQS</b> |
| 201 | <b>SWHDFADFEK</b>  | IFVKISNTIS         | ERVKNHWQED         | LMFGYQFLNG        | CNPVLIKRCT        |
| 251 | ALPPK <b>LPVTT</b> | <b>EMVECSLERQ</b>  | LSLEQEVQEG         | NIFIVDYELL        | DGIDANKTDP        |
| 301 | CTHQFLAAPI         | CLLYKNLANK         | IVPIAIQLNQ         | TPGESNPIFL        | PTDSKYDWLL        |
| 351 | AKIWVRSSDF         | HVHQITITHLL        | R <b>THLVSEVFG</b> | <b>IAMYRQLPAV</b> | <b>HPLFKLLVAH</b> |
| 401 | VRFTIAINTK         | AR <b>EQLICEYG</b> | <b>LFDKANATGG</b>  | <b>GGHVQMVQRA</b> | <b>VQDLTYSSLC</b> |
| 451 | <b>FPEAIKARGM</b>  | <b>DSTEDIPFYF</b>  | <b>YRDDGLLVWE</b>  | AIQSFTMEVV        | SIYYENDQVV        |
| 501 | EEDQELQDFV         | K <b>DVYVYGMRG</b> | KKASGFPKSI         | KSREKLSEYL        | TVVIFTASAQ        |
| 551 | HAAVNFGQYD         | WCSWIPNAPP         | TMRAPPPTAK         | <b>GVVTIEQIVD</b> | <b>TLPDRGRSCW</b> |
| 601 | HLGAVWALSQ         | FQENELFLGM         | YPPEHFIEKP         | VKEAMIRFRK        | <b>NLEAIVSVIA</b> |

Unformatted sequence string: **674 residues** (for pasting into other applications).Sort by  residue number  increasing mass  decreasing massShow  matched peptides only  predicted peptides also

| Start - End | Observed  | Mr (expt) | Mr (calc) | ppm   | M | Peptide                                    |
|-------------|-----------|-----------|-----------|-------|---|--------------------------------------------|
| 41 - 48     | 1061.4694 | 1060.4621 | 1060.4614 | 0.71  | 0 | K.AFYNDFER.G                               |
| 49 - 69     | 2314.1257 | 2313.1185 | 2313.1264 | -3.42 | 0 | R.GAVDSYDVTVDEELGEIYLVK.I                  |
| 74 - 84     | 1566.7790 | 1565.7717 | 1565.7667 | 3.22  | 1 | R.KYWLHDDWYLK.Y                            |
| 75 - 84     | 1438.6768 | 1437.6695 | 1437.6717 | -1.53 | 0 | K.YWLHDDWYLK.Y                             |
| 90 - 102    | 1654.7303 | 1653.7231 | 1653.7246 | -0.92 | 0 | K.TPHGDYIEFFPCYR.W                         |
| 103 - 113   | 1272.6941 | 1271.6868 | 1271.6874 | -0.45 | 0 | R.WITGEGEIVLR.D                            |
| 175 - 184   | 1141.5905 | 1140.5832 | 1140.5815 | 1.50  | 0 | K.GVDFVLNYSK.A                             |
| 185 - 193   | 1123.5581 | 1122.5508 | 1122.5491 | 1.48  | 0 | K.AMENLFINR.F<br>+ Oxidation (M)           |
| 194 - 210   | 2221.9049 | 2220.8976 | 2220.9034 | -2.58 | 0 | R.FMHMFQSSWHDFADFEK.I<br>+ 2 Oxidation (M) |
| 256 - 269   | 1679.7946 | 1678.7873 | 1678.7906 | -1.97 | 0 | K.LPVTTEMVECSLER.Q<br>+ Oxidation (M)      |
| 372 - 385   | 1622.8331 | 1621.8258 | 1621.8286 | -1.76 | 0 | R.THLVSEVFGIAMYR.Q                         |
| 386 - 395   | 1149.6787 | 1148.6714 | 1148.6706 | 0.70  | 0 | R.QLPAVHPLFK.L                             |
| 413 - 424   | 1514.7120 | 1513.7047 | 1513.7123 | -4.99 | 0 | R.EQLICEYGLFDK.A                           |
| 425 - 439   | 1498.7159 | 1497.7086 | 1497.7107 | -1.40 | 0 | K.ANATGGGGHVQMVQR.A<br>+ Oxidation (M)     |
| 440 - 456   | 1941.9575 | 1940.9502 | 1940.9554 | -2.64 | 0 | R.AVQDLTYSSLCFPEAIK.A                      |
| 459 - 472   | 1756.7489 | 1755.7417 | 1755.7450 | -1.93 | 0 | R.GMDSTEDIPFYFYR.D<br>+ Oxidation (M)      |
| 512 - 519   | 1018.4686 | 1017.4613 | 1017.4590 | 2.30  | 0 | K.DVYVYGMGR.G<br>+ Oxidation (M)           |
| 581 - 595   | 1654.8998 | 1653.8925 | 1653.8938 | -0.77 | 0 | K.GVVTIEQIVDTLPDR.G                        |
| 641 - 652   | 1313.7431 | 1312.7359 | 1312.7350 | 0.64  | 0 | K.NLEAIVSVIAER.N                           |
| 657 - 667   | 1414.7376 | 1413.7303 | 1413.7292 | 0.76  | 1 | K.KLPYYYLSPDR.I                            |
| 658 - 667   | 1286.6417 | 1285.6344 | 1285.6343 | 0.12  | 0 | K.LPYYYLSPDR.I                             |

No match to: 842.5103, 973.5280, 998.5301, 1044.0991, 1051.7162, 1082.0530, 1090.5309, 1107.5395, 1109.4912, 1118.5094, 1122.6311, 1143.6637, 1157.5931, 1165.5831, 1165.7492, 1179.6003, 1193.6160, 1234.6804, 1235.5278, 1249.1099, 1265.6389, 1271.0884, 1277.7102, 1300.5308, 1302.7148, 1307.6794, 1320.5820, 1323.6714, 1327.7578, 1330.7629, 1340.6619, 1348.5823, 1356.6611, 1357.7238, 1365.6378, 1381.6426, 1383.6893, 1393.7321, 1423.6841, 1434.7688, 1475.7454, 1475.7925, 1493.7344, 1505.6810, 1584.7099, 1603.8225, 1638.8662, 1664.7910, 1707.7706, 1716.8505, 1729.9444, 1741.7578, 1762.8620, 1765.7324, 1791.7260, 1797.0119, 1807.9162, 1811.9146, 1837.9732, 1838.9041, 1851.9212, 1859.9639, 1887.9709, 1934.0120, 1964.0663, 1968.8552, 1972.0113, 1981.9973, 1993.9737, 1996.9743, 2083.0339, 2096.0424, 2117.0253, 2150.0785, 2211.1074, 2225.1171, 2239.1399, 2256.0461, 2257.9590, 2283.1813, 2297.2067, 2342.9882, 2367.2645, 2383.9569, 2399.0148, 2510.1341, 2541.3305, 2565.1688, 2692.4308, 2705.1590, 2717.0912, 2808.3220, 2872.3841, 2902.3992, 3223.2832, 3312.3144

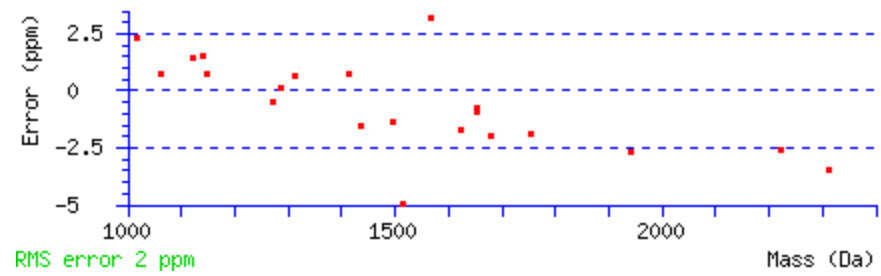

**Mascot:** <http://www.matrixscience.com/>
